# Supplementary material
Source: publisher figshare collection journal article supplement (https://tandf.figshare.com/articles/dataset/_/5625316)
Supplement: Supplementary file 1 [file 1]

## Sheet: Sheet1
Suppl. Table 1 The results of LA-ICP-MS zircon U-Pb data, temperature and oxygen fugacity from Qianjia intrusive rocks
Sample	Pb	Th	U	Th/U	207Pb/206Pb		207Pb/235U		206Pb/238U			208Pb/232Th			207Pb/206Pb		207Pb/235U		206Pb/238U		208Pb/232Th		Concordance		TTi (°C)	log ƒO2	∆ FMQ	Ti	Y	La	Ce	Pr	Nd	Sm	Eu	Gd	Tb	Dy	Ho	Er	Tm	Yb	Lu	Hf	Th	U
	ppm				Ratio	1σ	Ratio	1σ	Ratio	1σ	rho	Ratio	1σ		Age (Ma)	1σ	Age (Ma)	1σ	Age (Ma)	1σ	Age (Ma)	1σ						ppm	ppm	ppm	ppm	ppm	ppm	ppm	ppm	ppm	ppm	ppm	ppm	ppm	ppm	ppm	ppm	ppm	ppm	ppm
ZK0702-7-01	12.8536	395.765	690.223	0.573388	0.0526003	0.00357509	0.111361	0.0088115	0.0150564	0.000247449	0.207705	0.0049223	0.000285186		322.28	155.535	107.21	8.0507	96.3365	1.5715	99.2465	5.73601	89%		690.034	-15.0599	2.33982	3.3581	916.839	36.9681	119.125	9.33123	39.2746	9.32237	1.05734	20.831	6.23407	73.236	28.8766	143.136	32.2367	318.01	68.7576	14060.3	395.765	690.223
ZK0702-7-02	14.3961	406.222	770.421	0.527273	0.0499367	0.00234415	0.104581	0.00495453	0.0152547	0.000267971	0.370794	0.00456592	0.000153474		190.82	109.245	100.996	4.55447	97.5955	1.7015	92.0774	3.08795	96%		692.467	-16.7549	0.579599	3.45664	1075.6	0.352396	44.2653	0.139483	1.27177	2.53922	0.547209	15.6675	5.99158	77.9964	33.3174	169.278	39.8086	404.614	89.573	13346.6	406.222	770.421
ZK0702-7-03	4.06203	133.604	204.251	0.654115	0.0440954	0.00365827	0.0957809	0.00809239	0.0157842	0.000474781	0.356018	0.0048302	0.000248366		error		92.8743	7.49879	100.957	3.01307	97.3941	4.9959	91%		776.436	-15.4077	-0.137339	8.63887	638.434	0	16.1479	0.0495399	1.08584	2.47833	0.499933	13.1029	4.4583	52.6719	20.663	97.2608	21.4191	205.616	44.3022	11596.3	133.604	204.251
ZK0702-7-04	15.7161	487.421	842.227	0.578729	0.0468423	0.00267368	0.0977122	0.00560807	0.0151074	0.000224114	0.258473	0.00447091	0.000191454		42.69	129.615	94.6623	5.18751	96.6603	1.42323	90.1657	3.85248	97%		685.55	-16.8485	0.672497	3.18255	927.811	4.07258	49.6939	0.704214	3.48242	2.54247	0.582804	14.2849	5.24629	66.9567	28.5746	145.191	34.3253	354.111	80.5106	13614.8	487.421	842.227
ZK0702-7-05	5.22403	199.203	272.624	0.73069	0.0546596	0.00526576	0.111317	0.0104256	0.0148954	0.000316555	0.226911	0.00462472	0.000276913		398.2	223.115	107.169	9.52589	95.314	2.01069	93.2604	5.57127	88%		766.426	-15.5638	-0.0651096	7.80559	824.72	0.0499928	19.9653	0.0731269	1.31294	3.30182	0.708648	17.7383	5.46283	68.9798	26.3405	123.616	27.2626	256.247	55.6428	11978.3	199.203	272.624
ZK0702-7-06	13.4794	496.617	722.51	0.68735	0.0453667	0.00326999	0.0921692	0.00649762	0.0147334	0.000216762	0.208695	0.00446971	0.000220646		error		89.5221	6.04087	94.2846	1.37705	90.1414	4.43991	94%		728.53	-15.6493	0.755577	5.22005	973.193	2.85616	49.9801	0.66172	3.07711	2.84763	0.751472	15.705	5.70686	70.7328	30.4868	151.322	35.2542	363.481	81.0985	12304.8	496.617	722.51
ZK0702-7-07	4.39371	76.9755	247.448	0.311077	0.0494731	0.00437528	0.105047	0.00931033	0.0154749	0.000353155	0.257488	0.00486114	0.000329706		168.6	196.27	101.425	8.55509	98.9938	2.24189	98.0164	6.63186	97%		632.977	-19.972	-0.937789	1.63002	206.93	0.00253939	9.15368	0.0116051	0.0847944	0.369216	0.121376	2.03389	0.853255	11.8167	5.74081	35.0828	9.62439	123.057	33.2693	14659.8	76.9755	247.448
ZK0702-7-08	17.3506	563.142	920.016	0.6121	0.0434383	0.00221969	0.0920086	0.00463754	0.0152998	0.000233261	0.30248	0.00439101	0.00017249		error	error	89.3728	4.31215	97.8822	1.48104	88.5579	3.47116	90%		653.904	-17.8559	0.554708	2.14689	961.553	0	47.6558	0.0376795	0.791622	2.75666	0.619068	15.7352	5.76026	73.8815	30.5042	147.718	34.2227	336.653	72.8359	14034.5	563.142	920.016
ZK0702-7-09	6.99074	218.805	384.099	0.569657	0.04568	0.00310058	0.0916741	0.00570953	0.0148561	0.000309454	0.334455	0.00448108	0.000203569		error		89.0616	5.31057	95.064	1.96567	90.3704	4.09622	93%		699.055	-17.0897	0.0697325	3.73548	772.128	0.00243887	23.1087	0.0363573	0.774966	1.95657	0.498018	13.0771	4.76593	61.1076	24.2595	118.571	27.5995	273.079	60.118	12547.6	218.805	384.099
ZK0702-7-10	18.9377	652.884	981.923	0.664904	0.0417707	0.00195882	0.0903326	0.00449491	0.0155503	0.000248995	0.321791	0.00458658	0.000166821		error	error	87.8132	4.18596	99.4726	1.58055	92.4932	3.35643	87%		683.682	-16.7687	0.803121	3.1117	1157.29	2.37942	59.0402	0.728418	4.06425	3.74214	0.853964	19.7609	6.93701	88.0605	36.3384	180.984	40.9582	412.379	89.7885	13546.6	652.884	981.923
ZK0702-7-12	18.7716	646.576	1009.64	0.640403	0.0424885	0.0020148	0.090212	0.00441648	0.0153935	0.000280508	0.372218	0.00458326	0.000187377		error	error	87.7009	4.11337	98.4767	1.78086	92.4263	3.77003	88%		691.977	-16.8591	0.488494	3.43661	1018.11	0.0124087	50.6137	0.0641811	1.0457	2.7121	0.685154	15.6867	5.97902	76.1551	31.5049	158.709	36.7698	375.399	82.7475	13776.9	646.576	1009.64
ZK0702-7-13	7.66145	246.234	409.22	0.601716	0.043005	0.00327855	0.0888495	0.00670926	0.0151596	0.000326474	0.285194	0.00488436	0.000204698		error		86.4311	6.25665	96.9919	2.07316	98.4835	4.11728	88%		736.958	-16.2293	-0.0319827	5.72355	803.393	0.0294035	24.7076	0.0629166	0.934921	2.37958	0.36316	13.9481	4.69029	62.504	25.4884	122.485	27.5781	278.526	59.9416	13515.8	246.234	409.22
ZK0702-7-14	9.34304	269.922	506.016	0.533427	0.0481239	0.00357048	0.102072	0.00757407	0.0153872	0.000297533	0.260587	0.00463295	0.000181088		105.645	166.64	98.6874	6.97841	98.4372	1.88895	93.426	3.6433	99%		685.889	-17.3033	0.208503	3.19556	811.71	0.00497343	28.9389	0.0340227	0.699341	1.91475	0.441353	13.1304	4.59881	61.5994	25.918	125.008	29.0117	288.015	63.4141	13494.7	269.922	506.016
ZK0702-7-15	8.7605	435.443	389.674	1.11745	0.0478415	0.00322762	0.103548	0.00739648	0.015794	0.000338427	0.29998	0.00488581	0.00018775		100.09	142.57	100.047	6.80565	101.019	2.14772	98.5126	3.7764	99%		810.808	-14.693	-0.174121	12.0646	1549.47	0.0423566	24.5634	0.274511	4.99123	9.11046	2.19063	41.8207	12.5085	141.729	52.8057	227.109	46.5202	421.149	85.6019	10991.2	435.443	389.674
ZK0702-7-16	21.6074	822.497	1123.29	0.732224	0.0449743	0.00221261	0.0946353	0.00434834	0.0153385	0.000231712	0.328771	0.00451179	0.000157124		error		91.8122	4.03354	98.1278	1.47115	90.9882	3.16156	93%		667.146	-17.4148	0.616038	2.53952	1426.31	0.0406193	56.4391	0.0632196	2.15574	4.33036	1.09143	26.3999	9.06861	109.702	44.2888	214.522	48.9715	484.543	104.659	13534.1	822.497	1123.29
ZK0702-7-17	15.6101	532.551	835.27	0.637579	0.0419199	0.00230708	0.0891361	0.0048589	0.0154409	0.000228679	0.271687	0.00446357	0.000148665		error	error	86.6983	4.5299	98.7779	1.45174	90.018	2.9915	86%		713.061	-16.661	0.134099	4.39023	937.567	0	38.3332	0.0645114	1.41185	3.01914	0.575571	16.9748	5.92833	74.3692	30.1536	142.32	32.4856	318.371	69.6347	13619.3	532.551	835.27
ZK0702-7-19	14.0205	448.595	782.641	0.573181	0.0504891	0.00294412	0.104991	0.00648019	0.0150261	0.000200941	0.216663	0.00417425	0.000141405		216.74	135.165	101.373	5.95475	96.144	1.27617	84.1953	2.84624	94%		665.772	-17.3933	0.676456	2.49618	1130.09	0.0678366	45.8081	0.0761761	1.30138	2.39667	0.586377	17.2204	6.48179	81.768	34.7547	175.674	41.031	415.28	94.2114	13129.7	448.595	782.641
ZK0702-7-20	28.8911	2116.28	1186.79	1.7832	0.0469137	0.00194439	0.103811	0.00443532	0.0159836	0.000203126	0.297446	0.00402634	0.000100272		55.65	87.03	100.288	4.08003	102.222	1.28883	81.218	2.0186	98%		849.294	-12.9528	0.779426	17.1154	2466.44	1.15411	73.0283	0.609314	6.87344	13.8509	6.6514	70.0077	20.1089	218.072	78.1231	341.499	72.7688	704.027	150.578	8413.98	2116.28	1186.79
ZK0702-7-21	3.63063	112.907	195.186	0.578457	0.0523011	0.00446957	0.110315	0.00930779	0.0155385	0.000343965	0.262356	0.00408238	0.000214313		298.21	191.643	106.253	8.51218	99.3976	2.18341	82.3461	4.31413	93%		777.008	-15.4589	-0.201384	8.68854	458.145	0	15.1839	0.0312751	0.56888	1.62695	0.37012	8.58488	3.086	37.3011	14.8918	69.5116	15.4257	153.52	33.6137	12084.4	112.907	195.186
ZK0702-7-22	15.8528	493.816	847.891	0.582405	0.0448298	0.00214212	0.101637	0.00539464	0.0162515	0.000309889	0.359255	0.00453505	0.000185285		error		98.2863	4.9723	103.922	1.96573	91.4563	3.72812	94%		708.572	-16.349	0.561678	4.17086	1217.06	0.0180265	47.119	0.0445691	1.27613	3.25049	0.807697	18.9332	6.89935	91.0256	37.4694	185.677	43.8852	435.487	95.2704	12972.2	493.816	847.891
ZK0702-7-23	7.92894	273.367	409.561	0.667465	0.0446914	0.0034023	0.0976383	0.00704714	0.0159663	0.000266535	0.23129	0.00409405	0.000174819		error		94.594	6.51913	102.113	1.69119	82.5809	3.51907	92%		776.931	-15.1539	0.105299	8.68187	750.541	0.00248359	27.0092	0.0865616	0.953871	2.70449	0.592969	14.9014	4.96148	59.6014	24.0933	112.564	25.1663	242.807	52.6244	12124	273.367	409.561
ZK0702-7-24	11.7236	494.926	547.754	0.903556	0.0550624	0.00344573	0.123071	0.00783149	0.0161443	0.000257421	0.250574	0.00477351	0.000199506		413.01	108.323	117.852	7.08067	103.242	1.63308	96.2536	4.01331	86%		817.549	-9.63363	4.74347	12.8495	1547.04	201.176	472.584	54.6048	241.665	51.7666	5.43679	69.9282	14.7049	143.007	50.4086	220.088	45.3271	418.688	86.7137	11849.8	494.926	547.754
ZK0702-7-25	6.91269	203.879	365.982	0.557074	0.0451384	0.00297549	0.0992043	0.00631062	0.0160034	0.000353636	0.347378	0.00440334	0.0002285		error		96.0416	5.82946	102.348	2.24378	88.8058	4.59826	93%		772.702	-15.4338	-0.0787258	8.31996	829.427	0.00769885	21.8145	0.0583719	1.2272	2.5314	0.588054	15.6273	5.3103	63.3496	25.9357	127.233	28.6868	286.225	62.8166	11787.4	203.879	365.982
ZK0702-7-26	8.37393	331.785	416.754	0.796115	0.0424726	0.00326069	0.0922283	0.00657404	0.0158107	0.000324508	0.287944	0.00451863	0.000193247		error	error	89.577	6.11158	101.125	2.05936	91.1258	3.88838	87%		781.404	-15.0431	0.115594	9.07836	1154.07	0.0950391	28.7734	0.157284	2.04022	5.05117	1.10054	26.3646	8.44574	97.129	37.6909	170.697	37.3321	350.242	73.7818	12368.9	331.785	416.754
ZK0702-7-28	8.22836	217.506	443.852	0.490042	0.0420986	0.00311492	0.0920233	0.0064118	0.0160281	0.000293481	0.262794	0.0044508	0.000206131		error	error	89.3864	5.96188	102.505	1.86206	89.761	4.14792	86%		702.374	-16.9229	0.149155	3.88286	518.848	0.103541	25.3685	0.0243475	0.589953	1.31509	0.428237	8.91599	3.03507	39.3684	16.3733	80.0547	18.7429	189.975	42.1308	12507.8	217.506	443.852
ZK0702-7-29	6.55317	205.002	358.614	0.571651	0.0495102	0.00340803	0.103534	0.00662427	0.0154563	0.00029193	0.295201	0.00397058	0.000215553		172.305	-37.96	100.033	6.09519	98.8756	1.85325	80.0953	4.33959	98%		737.03	-16.3282	-0.132561	5.72802	739.271	0.0126501	20.8597	0.0384546	0.646573	2.27653	0.45231	12.4022	4.5099	56.8631	23.5328	114.703	26.0104	257.657	56.6119	12572.3	205.002	358.614
ZK0702-7-30	8.41329	430.034	427.459	1.00602	0.0509064	0.0043158	0.103718	0.00816059	0.0149877	0.000330747	0.280475	0.00425566	0.000199427		235.25	196.273	100.203	7.5076	95.9004	2.10065	85.8339	4.01379	95%		821.526	-14.3049	-0.0106335	13.3315	1600.75	0.0272984	28.1441	0.276532	5.40639	9.37312	2.00178	42.4129	12.9397	143.795	53.0724	229.933	46.6157	432.213	88.5133	11114.6	430.034	427.459
ZK0702-7-31	3.82107	140.363	199.955	0.701972	0.0463884	0.00432607	0.0954621	0.00816856	0.0152196	0.000348446	0.267558	0.00492107	0.000238022		16.765	211.08	92.5789	7.57158	97.3725	2.21255	99.2218	4.7874	94%		813.186	-14.6103	-0.141591	12.337	618.728	0.00767556	16.456	0.0525995	1.13436	2.38214	0.545452	13.8539	4.49275	53.5537	19.8686	92.9507	19.9696	193.331	41.9326	11153.6	140.363	199.955
ZK0702-7-32	8.01477	223.301	430.483	0.518721	0.0513285	0.00350838	0.11149	0.00752786	0.0160224	0.000282295	0.260939	0.0048384	0.000225511		253.77	152.757	107.327	6.87706	102.468	1.79109	97.5591	4.53613	95%		703.844	-17.1454	-0.111723	3.94962	750.413	0.0126516	21.5567	0.0481785	1.00279	2.0681	0.540528	12.3819	4.31464	55.6387	23.1047	115.857	27.1382	281.366	64.3756	12259.6	223.301	430.483
ZK0702-7-33	6.78474	293.273	328.966	0.8915	0.0447672	0.00326249	0.0966374	0.00698609	0.0158282	0.000321005	0.280538	0.00479782	0.000176738		error		93.6677	6.46855	101.236	2.03709	96.7428	3.55521	92%		832.96	-14.1392	-0.0798393	14.7985	835.491	0.895379	23.2095	0.337091	2.74475	3.65781	0.92122	19.019	6.26416	72.1207	27.6671	126.176	26.612	249.061	52.1723	11044.9	293.273	328.966
ZK0702-7-34	11.9954	357.197	653.227	0.546819	0.0426138	0.00215635	0.091645	0.00479624	0.0155161	0.000236818	0.291635	0.00490255	0.000180264		error	error	89.0346	4.4612	99.2553	1.5033	98.8493	3.62577	89%		690.764	-17.1484	0.231774	3.38741	930.322	0.0218735	33.7367	0.0644328	0.531042	2.71086	0.450793	15.5229	5.46049	69.405	29.2203	145.411	33.7623	340.403	75.135	13517.1	357.197	653.227
ZK0702-7-35	5.44799	258.447	261.152	0.98964	0.0419434	0.00304272	0.0896514	0.00583959	0.0159852	0.000332969	0.319786	0.00483149	0.000201827		error	error	87.1786	5.44163	102.233	2.11268	97.42	4.05976	84%		808.024	-14.62	-0.0419778	11.7519	1269.74	0.00676326	21.2587	0.250167	4.10863	8.01279	1.90157	35.2243	10.4728	115.951	42.501	183.66	37.7173	343.502	70.1738	11098.6	258.447	261.152
ZK0702-13-01	110.466	8229.34	4119.79	1.99752	0.0490808	0.00224553	0.107879	0.00493449	0.0158203	0.00022573	0.31194	0.00473071	0.000171997		150.085	107.392	104.024	4.52254	101.186	1.43249	95.3927	3.46007	97%		742.7	-14.3173	1.74068	6.08884	2231.6	0.169802	211.481	0.490992	7.14958	14.3084	6.82696	63.792	18.0197	196.239	70.711	313.53	67.4397	652.72	136.869	10326.5	8229.34	4119.79
ZK0702-13-02	5.65837	120.798	305.269	0.395709	0.0460558	0.00380131	0.10113	0.00843925	0.0159743	0.000327942	0.246009	0.00489863	0.000286624		400.05	-212.93	97.8191	7.78222	102.163	2.08081	98.7705	5.76508	95%		636.44	-18.8978	0.0311622	1.70752	323.452	0.0261929	16.5435	0.00804089	0.316817	0.589377	0.143032	4.06654	1.66815	21.7043	9.78187	52.504	12.7457	138.686	32.8738	14682.5	120.798	305.269
ZK0702-13-03	34.1861	1923.01	1383.65	1.3898	0.0552243	0.00265418	0.122322	0.00570413	0.0160991	0.000260404	0.346866	0.00507966	0.000168622		420.42	107.395	117.175	5.16066	102.955	1.65208	102.411	3.391	87%		707.04	-15.6089	1.34146	4.09809	2144.8	0.186535	88.6057	0.723368	11.4606	15.7659	6.52286	58.9848	17.1451	191.146	69.2908	312.159	68.373	673.4	144.625	10640.8	1923.01	1383.65
ZK0702-13-04	43.4292	3238.37	1625.31	1.99246	0.0446216	0.00173932	0.0997677	0.00413795	0.0161379	0.000214708	0.320779	0.00478501	0.000147475		error		96.5619	3.82046	103.201	1.36212	96.4851	2.9666	93%		771.934	-13.5532	1.81935	8.25557	4091.1	0.209632	130.992	1.30875	20.7732	33.6337	13.4396	133.79	37.2302	384.271	132.497	577.041	121.478	1160.47	245.059	8576.77	3238.37	1625.31
ZK0702-13-05	11.6833	441.479	517.77	0.852654	0.0461645	0.0030354	0.10813	0.00754276	0.0167474	0.000322294	0.27588	0.00542201	0.00029648		5.655	161.095	104.254	6.91157	107.067	2.04342	109.295	5.9602	97%		669.867	-17.7138	0.240372	2.62716	589.353	0.366782	28.4599	0.322785	3.27496	3.47107	1.45294	15.5604	4.40628	49.767	18.9195	92.161	21.0684	227.026	54.1616	13775.2	441.479	517.77
ZK0702-13-06	5.82214	124.08	326.038	0.380568	0.044201	0.00432025	0.0962714	0.0102238	0.0156311	0.000320535	0.193095	0.0045623	0.000250161		error		93.3287	9.46972	99.9849	2.0345	92.0046	5.03336	93%		639.842	-18.9621	-0.135731	1.78665	278.522	0	15.5178	0.00704125	0.103633	0.40716	0.106396	3.31217	1.10076	17.4221	7.95788	45.1413	11.5561	129.869	32.3996	14703.7	124.08	326.038
ZK0702-13-07	9.08107	335.904	459.233	0.731445	0.0473668	0.00304607	0.100524	0.00640476	0.0154463	0.000240233	0.244104	0.00478105	0.000162058		77.87	135.165	97.2602	5.90933	98.8121	1.52508	96.4055	3.25996	98%		698.934	-17.0478	0.114779	3.73023	725.913	0.0203018	24.662	0.0954721	1.35047	2.64316	0.855122	14.419	4.7063	57.79	22.6477	112.477	26.3433	270.881	61.1756	13184.7	335.904	459.233
ZK0702-13-08	77.7936	5281.48	2916.55	1.81086	0.0474543	0.00141572	0.108104	0.00375218	0.0164929	0.000260976	0.45589	0.00521889	0.000154028		72.315	70.365	104.229	3.43823	105.453	1.65507	105.211	3.09708	98%		764.21	-13.4254	2.12445	7.6303	4527	0.287623	209.551	1.66481	24.9731	33.0086	14.094	134.335	38.2251	409.015	145.598	651.714	139.69	1321.52	279.988	9108.6	5281.48	2916.55
ZK0702-13-09	20.636	933.056	1024.87	0.910418	0.0540435	0.00263251	0.112687	0.00582934	0.0150808	0.000238904	0.306235	0.00509845	0.000176279		372.275	111.1	108.42	5.31962	96.4912	1.51719	102.789	3.54493	88%		747.607	-15.3978	0.542329	6.41591	950.966	0.0746448	48.6617	0.13756	2.44855	4.01734	2.06673	20.5553	6.43124	75.5144	29.8657	144.534	33.3689	349.722	79.3075	11507.2	933.056	1024.87
ZK0702-13-10	6.56707	145.014	359.192	0.403722	0.0493615	0.00346725	0.105696	0.00698094	0.0157917	0.000284345	0.272622	0.00495461	0.000249385		164.9	155.53	102.02	6.41083	101.004	1.80451	99.8964	5.01577	98%		687.514	-17.7673	-0.299584	3.25847	275.13	0.0102887	15.8171	0.0158013	0.173424	0.469893	0.162434	3.42389	1.30401	16.6112	7.62284	44.1247	11.9157	138.661	35.9229	14299.5	145.014	359.192
ZK0702-13-11	38.9614	911.087	2133.09	0.427121	0.0495194	0.00148163	0.104519	0.00308205	0.0152835	0.000200775	0.445496	0.00548154	0.000171438		172.305	70.36	100.939	2.83333	97.7783	1.27479	110.492	3.44625	96%		667.61	-18.3268	-0.309022	2.55428	926.38	0.138933	40.2125	0.272743	4.15539	5.30313	2.43755	22.9074	7.08211	78.8974	28.8285	136.757	31.1792	324.348	82.7474	16137	911.087	2133.09
ZK0702-13-12	9.04473	376.746	436.43	0.863245	0.0471122	0.00329888	0.0986206	0.00664086	0.0153054	0.000291075	0.282424	0.00492901	0.000216227		53.8	159.235	95.5023	6.13779	97.9178	1.8481	99.3815	4.349	97%		697.048	-16.9903	0.222138	3.64865	691.403	0.0222519	25.615	0.117629	2.08274	3.36811	1.44309	16.4149	5.28397	57.4961	22.51	105.813	24.2683	245.68	55.3516	12510.8	376.746	436.43
ZK0702-13-13	12.1818	320.42	638.541	0.5018	0.0600883	0.00380702	0.132712	0.00947291	0.0158058	0.000277364	0.245844	0.00699689	0.000555628		605.575	137.018	126.531	8.49188	101.094	1.76018	140.93	11.1525	77%		681.055	-17.1981	0.445544	3.01427	617.312	0.251042	33.26	0.144932	1.52677	1.89888	0.42623	9.9899	3.52477	45.5582	19.4529	96.3793	23.1941	233.69	52.6194	14168	320.42	638.541
ZK0702-13-15	39.0925	2617.19	1654.85	1.58153	0.0424214	0.00175787	0.0886723	0.00376452	0.0150307	0.000153271	0.240191	0.00487272	0.000105093		error	error	86.2658	3.51111	96.1732	0.973414	98.2494	2.11387	89%		704.086	-15.7528	1.27451	3.96071	2486.07	0.127722	102.318	0.709105	10.4601	15.5635	6.19946	68.254	19.8675	220.123	79.7405	364.7	79.7219	769.745	168.663	12312.4	2617.19	1654.85
ZK0702-13-16	9.31403	200.946	526.292	0.381814	0.0459427	0.00263541	0.094793	0.00525533	0.0150191	0.000283727	0.340747	0.0051159	0.000250807		error		91.9585	4.87418	96.0998	1.80196	103.14	5.04356	95%		671.469	-17.914	-0.00471479	2.6799	540.649	0.00891802	22.4157	0.0343556	0.652143	1.38757	0.417695	8.44911	2.95115	38.8029	16.6445	85.5065	20.8879	212.508	48.3094	14863	200.946	526.292
ZK0702-13-17	16.3844	776.258	759.978	1.02142	0.0405486	0.00182097	0.0881213	0.0040216	0.0157815	0.000277428	0.385197	0.00523974	0.000160966		error	error	85.7518	3.75278	100.94	1.76063	105.63	3.23652	83%		694.099	-16.6997	0.59122	3.52406	1229.78	0.0418526	40.7169	0.307599	4.27451	6.68792	3.25514	29.4821	9.01269	102.078	38.9122	184.933	41.3958	404.561	89.442	11225.6	776.258	759.978
ZK0702-13-18	12.2447	487.128	568.086	0.857488	0.0386003	0.00225789	0.0853665	0.00511983	0.0159671	0.000287193	0.299902	0.00510495	0.000204326		error	error	83.1778	4.78974	102.118	1.82227	102.92	4.10891	79%		679.716	-17.0062	0.674221	2.96559	866.765	0.0165988	33.1392	0.192487	2.53958	4.33808	1.84697	18.4142	5.87799	68.3895	26.8367	128.704	30.1331	306.543	69.3228	10029.7	487.128	568.086
ZK0702-13-19	6.12972	153.994	324.135	0.475093	0.0549094	0.00398652	0.116614	0.00926494	0.0153236	0.000265602	0.218162	0.00497669	0.000236255		409.31	162.947	111.998	8.42518	98.0334	1.68634	100.341	4.75158	86%		611.994	-19.3038	0.386176	1.22061	393.605	0.102829	20.3144	0.0785873	0.721215	1.15332	0.45267	5.41521	2.12748	27.8605	12.1878	62.1291	15.089	157.095	35.6139	14022.2	153.994	324.135
ZK0702-13-20	35.6911	2173.58	1566.67	1.38739	0.0444694	0.00206923	0.0930895	0.00458538	0.0151665	0.00028362	0.379643	0.00502222	0.000182747		error		90.3773	4.25943	97.0358	1.80101	101.256	3.67526	92%		716.589	-15.3337	1.37133	4.56923	2587.97	0.139725	89.9401	0.805383	12.3237	16.6677	7.81384	70.8338	20.2252	223.788	83.3909	375.066	81.2084	789.759	172.509	9127.56	2173.58	1566.67
ZK0702-13-21	15.7823	715.344	764.43	0.935788	0.0461843	0.00269117	0.0959854	0.0055425	0.0149944	0.000290787	0.33585	0.00499712	0.000190607		5.655	137.025	93.0638	5.13493	95.9425	1.84684	100.751	3.83343	96%		699.802	-16.4089	0.730813	3.76827	1191.6	0.167331	44.381	0.389275	4.53406	6.60396	2.90274	28.1689	8.6224	96.2615	36.6513	175.608	39.6567	390.569	87.2076	11494.4	715.344	764.43
ZK0702-13-22	5.39006	149.358	291.766	0.51191	0.0463274	0.00336769	0.0996722	0.00780908	0.0152824	0.000335461	0.280171	0.00518581	0.000296391		13.06	175.91	96.4737	7.21064	97.7716	2.12997	104.546	5.95981	98%		649.602	-18.4058	0.130648	2.03079	357.572	0.0209914	17.1744	0.0499915	0.506743	0.910921	0.394519	5.15234	1.90578	23.8073	10.5174	56.0863	13.4679	146.138	34.482	12921	149.358	291.766
ZK0702-13-23	87.1129	6339.41	3324.25	1.90702	0.0449656	0.00187146	0.097509	0.00405037	0.0155288	0.000215561	0.334183	0.00526684	0.000165458		error		94.4744	3.7473	99.3355	1.36835	106.175	3.32676	94%		778.723	-13.0021	2.21676	8.83898	4769.55	1.15633	244.207	1.98758	26.6003	38.3791	15.6085	143.389	40.1949	424.602	148.726	650.296	138.853	1300.74	267.511	9279.4	6339.41	3324.25
ZK0702-13-24	6.64164	120.063	362.142	0.331537	0.0439715	0.00332006	0.0982699	0.00719688	0.0162366	0.000377396	0.31738	0.00500072	0.000304601		error		95.1781	6.65382	103.827	2.39398	100.824	6.12604	91%		654.715	-18.5007	-0.113664	2.16938	304.519	0	16.4574	0	0.165959	0.648846	0.111185	3.93921	1.35285	19.3915	8.6681	48.5283	12.0435	131.268	31.2593	14593.4	120.063	362.142
ZK0702-13-25	75.9797	5251.39	3078.55	1.7058	0.0461314	0.00230459	0.0990871	0.0048381	0.0152998	0.000227481	0.304509	0.00521378	0.000184301		400.05	-279.59	95.9333	4.46967	97.882	1.44434	105.108	3.70581	97%		787.832	-13.5021	1.51371	9.67369	1926.53	1.21811	162.653	1.08205	10.7498	11.9525	5.44246	50.6857	15.2157	164.444	59.6844	269.499	58.7575	562.664	120.966	10183.8	5251.39	3078.55
ZK0702-13-26	16.3052	812.848	722.173	1.12556	0.0465758	0.00308848	0.105235	0.00708448	0.0160018	0.000275066	0.255342	0.00543651	0.000209942		27.875	161.095	101.597	6.50862	102.337	1.74526	109.586	4.22046	99%		663.235	-17.3851	0.756806	2.4178	1119.77	0.035008	44.8832	0.264332	3.91408	6.93195	2.60439	27.8295	8.51932	93.4386	35.3549	165.259	37.2215	376.999	83.5414	12473	812.848	722.173
ZK0702-13-27	6.41793	159.75	371.583	0.429916	0.0513291	0.00443007	0.106297	0.00932272	0.0148217	0.000302593	0.232775	0.00494125	0.000270466		257.47	199.975	102.572	8.55679	94.8459	1.92215	99.6277	5.43985	92%		670.845	-17.8178	0.108943	2.65927	458.977	0.00500094	20.2146	0.00950511	0.259422	0.976689	0.223235	5.7961	2.22085	31.5203	13.399	73.1531	17.4003	190.027	43.4868	14438	159.75	371.583
ZK0702-13-28	19.5773	857.09	910.062	0.941793	0.0459646	0.00221004	0.101488	0.0049742	0.015746	0.000261312	0.338593	0.00519884	0.000200522		error		98.1486	4.58539	100.715	1.65841	104.808	4.03204	97%		645.431	-17.8444	0.815222	1.92324	764.694	0.00497349	51.1318	0.0623707	1.45768	2.59025	1.11836	15.1339	4.71739	60.039	23.4017	114.428	26.1386	266.835	58.2904	13504.2	857.09	910.062
ZK0702-13-30	22.0181	474.678	1242.17	0.382135	0.0498084	0.00244104	0.108302	0.00522277	0.015631	0.000228324	0.3029	0.00476582	0.000166399		187.12	108.317	104.411	4.78493	99.9845	1.44922	96.099	3.34735	95%		685.281	-17.6507	-0.122461	3.17229	483.199	0.239833	32.3597	0.166832	0.95859	1.34225	0.450877	6.49166	2.35452	29.7905	13.5698	74.2647	20.4663	231.226	61.2673	14409.1	474.678	1242.17
ZK0702-13-31	47.5248	2702.2	2240.43	1.20611	0.0503521	0.00209163	0.107325	0.00476788	0.0153382	0.00024068	0.353215	0.00464384	0.000141574		213.035	91.6525	103.516	4.37203	98.126	1.52808	93.6451	2.8483	94%		679.432	-16.5533	1.13496	2.95535	2784.25	0.127791	98.3981	0.867775	11.9817	17.972	7.80001	74.4784	21.4948	235.892	87.6734	399.627	87.2404	846.675	189.565	11597.3	2702.2	2240.43
ZK0702-13-32	12.9984	539.231	652.491	0.826419	0.0540152	0.00251168	0.114025	0.00525145	0.0152614	0.000238702	0.339609	0.00475265	0.000150293		372.275	103.692	109.64	4.7865	97.6384	1.51564	95.834	3.02339	88%		694.873	-16.6331	0.637119	3.55641	1117.38	0.000594419	40.3697	0.141897	2.09603	5.268	1.72971	22.7392	7.38112	88.741	35.1873	166.839	37.9159	376.84	82.5169	13171	539.231	652.491
ZK0702-13-33	25.3959	1469.04	1258.64	1.16716	0.0498385	0.00272175	0.102706	0.00545529	0.014983	0.000219899	0.276314	0.00454472	0.000145229		187.12	127.76	99.2709	5.02333	95.8699	1.39663	91.6509	2.92212	96%		731.707	-15.2327	1.09348	5.40538	1872.63	2.15186	71.1147	0.830661	8.97836	10.7282	4.99873	45.5378	13.9842	154.05	57.6822	272.264	60.585	604.368	133.17	10055.8	1469.04	1258.64
ZK0702-13-35	9.81064	430.175	482.753	0.891088	0.0482887	0.00285135	0.100703	0.00576138	0.0151386	0.000248108	0.286465	0.00473002	0.00015491		122.31	133.31	97.4253	5.31484	96.8587	1.57556	95.3789	3.11634	99%		699.89	-16.5863	0.551076	3.77214	767.97	0.040168	30.6677	0.183637	2.72	4.0989	1.59883	16.9304	5.3575	61.6971	24.0647	115.439	26.3459	275.214	62.4426	10897.5	430.175	482.753
ZK0702-24-01	22.1763	798.848	1178.12	0.678069	0.0501456	0.00228814	0.101088	0.00459113	0.0146492	0.000198576	0.298464	0.00463012	0.000160395		211.185	102.763	97.7797	4.23379	93.7495	1.26162	93.369	3.227	95%		723.796	-16.1318	0.391116	4.9535	923.653	0.523412	52.8126	0.214443	1.83687	2.77395	0.652169	15.6681	5.73099	70.0609	28.5851	141.617	33.1505	340.52	77.5822	13758.9	798.848	1178.12
ZK0702-24-02	11.0022	340.528	573.364	0.593913	0.0579886	0.00334964	0.121145	0.00713876	0.0151641	0.00022926	0.256564	0.00478069	0.000183228		527.815	125.907	116.11	6.46542	97.0206	1.45583	96.3981	3.68583	82%		776.235	-15.3394	-0.064395	8.6214	905.748	0.00505753	28.7307	0.054866	1.08311	2.78799	0.596073	15.7003	5.50863	71.8828	28.603	140.575	30.9111	314.303	67.9322	13174.4	340.528	573.364
ZK0702-24-03	6.09265	199.611	325.543	0.613163	0.0531103	0.00345861	0.108862	0.00721884	0.0148376	0.000257714	0.261929	0.00487217	0.000231322		344.5	143.5	104.924	6.61037	94.9465	1.63704	98.2382	4.65285	90%		764.119	-15.3933	0.158671	7.62314	824.117	0.00980608	23.1518	0.0457012	0.950818	2.45285	0.650676	14.4411	5.37352	65.2402	26.3762	126.354	27.6288	279.878	61.8006	11855.5	199.611	325.543
ZK0702-24-04	10.6501	406.426	557.662	0.728802	0.0497534	0.00337181	0.102165	0.00679194	0.0149826	0.000306437	0.307654	0.00474584	0.000182545		183.415	163.868	98.7725	6.25724	95.8675	1.94626	95.6971	3.67221	97%		696.695	-16.5055	0.716358	3.63356	1228.45	0.0293255	41.3559	0.14787	3.22134	6.45601	2.00251	28.6169	9.18006	105.192	39.3147	184.446	40.3533	397.304	84.9041	12781.8	406.426	557.662
ZK0702-24-05	17.8691	583.127	942.608	0.618632	0.0474787	0.00239995	0.0976014	0.00496215	0.0148909	0.000210819	0.278467	0.00483923	0.000168164		72.315	118.505	94.5598	4.59048	95.2855	1.33909	97.5758	3.3826	99%		706.67	-16.42	0.539967	4.08067	895.017	2.03224	49.6823	0.429157	2.28349	2.53025	0.634677	14.9306	5.59893	68.6378	27.9154	138.992	32.2404	323.653	71.4236	13850.3	583.127	942.608
ZK0702-24-06	4.21029	171.62	216.636	0.792206	0.0555681	0.00462554	0.114553	0.0101022	0.0150103	0.000370483	0.279876	0.00484317	0.000287788		435.23	185.162	110.121	9.20362	96.0436	2.35297	97.655	5.7888	86%		798.827	-14.8872	-0.111866	10.7648	795.862	0.00249213	17.1733	0.0637485	1.58316	3.34241	0.78524	18.9801	5.78788	67.585	25.6663	115.654	24.3512	230.138	49.1635	11245.2	171.62	216.636
ZK0702-24-07	12.4682	375.707	662.254	0.567315	0.0521788	0.00326307	0.1074	0.00654112	0.0149915	0.000260411	0.285209	0.00484772	0.000189304		300.06	144.425	103.584	5.99767	95.9245	1.65392	97.7466	3.80779	92%		727.708	-15.2592	1.16602	5.17295	969.828	8.31278	56.9795	2.39029	10.0359	3.56835	0.736612	16.1133	5.56546	71.6616	29.6859	149.57	35.4596	373.874	82.9629	12415	375.707	662.254
ZK0702-24-08	7.13961	211.181	371.437	0.56855	0.045361	0.00307702	0.0980742	0.00647502	0.0158734	0.000349929	0.333906	0.004811	0.000223941		error		94.9971	5.98749	101.523	2.22054	97.0078	4.50467	93%		722.989	-15.2	1.3432	4.90918	725.748	13.2876	47.4487	2.71072	9.50905	2.87515	0.628265	13.7595	4.52589	58.2238	22.9382	110.116	25.1313	246.754	55.1889	12693.1	211.181	371.437
ZK0702-24-09	17.4986	584.314	932.849	0.626376	0.051847	0.00268615	0.10778	0.00619528	0.0149332	0.000263506	0.306985	0.00488255	0.000176874		279.69	120.353	103.933	5.6786	95.5539	1.67368	98.447	3.55764	91%		672.321	-17.1742	0.711185	2.70831	1047.93	0.00962251	51.8556	0.0641654	1.36784	3.11927	0.547839	18.0187	6.20175	81.0421	32.5974	162.346	36.3984	362.892	78.6619	13652.2	584.314	932.849
ZK0702-24-10	3.5601	119.412	183.128	0.652068	0.0474879	0.00364422	0.0963792	0.00721421	0.0149131	0.000309724	0.277461	0.0056623	0.000304331		72.315	183.305	93.4285	6.68135	95.4261	1.96727	114.125	6.11656	97%		830.207	-14.3632	-0.247695	14.4341	668.764	0.00983853	14.7265	0.0637643	1.34226	2.61981	0.645449	14.3055	4.72867	55.6501	21.301	99.2776	21.4176	207.809	44.066	11588	119.412	183.128
ZK0702-24-11	14.1598	444.157	766.98	0.579099	0.0536908	0.00306314	0.11203	0.00656105	0.0150517	0.000250736	0.284442	0.00482021	0.000180022		366.72	124.987	107.821	5.99089	96.3066	1.59238	97.1931	3.62119	88%		725.93	-15.976	0.493586	5.07222	1005.99	0.182721	43.8713	0.103396	1.27187	2.93526	0.606972	17.5961	6.10737	78.1658	32.4147	159.093	35.4602	355.22	76.9495	13681.8	444.157	766.98
ZK0702-24-12	6.86993	276.336	335.389	0.823928	0.0507486	0.00399435	0.109039	0.0085637	0.0158735	0.000450469	0.361339	0.00543157	0.000245942		227.845	215.715	105.086	7.84067	101.523	2.85854	109.487	4.94418	96%		776.459	-15.2319	0.0379612	8.64083	903.397	0.0052017	23.3363	0.0774229	1.33921	3.73309	0.915252	18.8191	6.18144	73.5394	29.4568	136.922	29.0216	282.155	60.1646	11712.7	276.336	335.389
ZK0702-24-13	7.48671	204.113	399.018	0.511538	0.0513958	0.00319046	0.111489	0.0068191	0.0156674	0.000260021	0.271341	0.00494729	0.000261348		257.47	142.572	107.326	6.22956	100.215	1.65034	99.7493	5.25642	93%		639.604	-18.6548	0.178698	1.781	605.514	0.00490166	23.1712	0.0273314	0.812907	1.41508	0.368576	9.614	3.33222	45.56	18.5259	95.6174	21.5815	218.863	49.0957	13953.1	204.113	399.018
ZK0702-24-14	21.5489	761.872	1167.88	0.652353	0.0520382	0.00259772	0.108218	0.00569452	0.0149442	0.000237118	0.301533	0.0046285	0.000148634		287.1	114.8	104.334	5.21754	95.6237	1.50606	93.3364	2.99038	91%		676.412	-16.9754	0.796255	2.84824	1307.37	0.193781	61.7033	0.120057	1.70371	3.55539	0.832883	22.3665	8.24815	100.519	41.4337	201.81	45.3663	455.34	98.1421	13629.7	761.872	1167.88
ZK0702-24-15	7.53631	266.67	386.474	0.690007	0.0527736	0.00406136	0.112723	0.00824275	0.0155839	0.000282769	0.248141	0.00493688	0.000208958		320.43	141.65	108.454	7.52182	99.6852	1.79487	99.5399	4.20276	91%		755.776	-15.6121	0.134394	6.992	776.644	0.0147426	25.4406	0.062954	1.12897	2.85084	0.585076	15.6189	5.00817	63.0939	24.8205	118.672	26.0195	254.202	54.8344	12085.1	266.67	386.474
ZK0702-24-16	12.5931	399.451	683.069	0.584789	0.0482549	0.00323792	0.102736	0.00685609	0.0154268	0.00028725	0.279018	0.00500221	0.000176595		122.31	138.865	99.2989	6.31307	98.6882	1.8236	100.854	3.55162	99%		723.17	-16.194	0.344647	4.91912	936.624	0.000377676	37.1478	0.0314264	1.2419	2.63685	0.631378	15.5822	5.64457	72.3717	29.9932	145.828	33.8537	342.806	75.7998	13114	399.451	683.069
ZK0702-24-17	6.14831	339.755	295.526	1.14966	0.0520653	0.00447978	0.105561	0.00844239	0.0147763	0.000312859	0.264741	0.00457922	0.000207756		287.1	196.273	101.896	7.75391	94.5571	1.98745	92.345	4.18006	92%		831.113	-14.2269	-0.12988	14.5533	1140.31	0.0478369	21.4968	0.254566	3.94608	5.89764	1.78866	32.2048	9.34291	105.247	38.5739	170.684	34.6189	316.346	66.2175	10634	339.755	295.526
ZK0702-24-18	13.829	494.845	727.579	0.680126	0.0504412	0.00288245	0.108183	0.00584777	0.0156785	0.000266601	0.314575	0.00500778	0.000180977		216.74	133.315	104.302	5.35813	100.286	1.69209	100.966	3.63971	96%		719.47	-16.2067	0.425255	4.71977	1085.41	0.888816	40.7702	0.219825	1.92347	3.26574	0.865014	19.5532	7.11353	86.6372	34.6994	167.401	36.8266	364.681	80.1707	12899.9	494.845	727.579
ZK0702-24-19	15.2594	539.781	806.121	0.669602	0.0474042	0.0023604	0.103022	0.00503109	0.0157721	0.000255593	0.331839	0.00507556	0.000172384		77.87	105.545	99.562	4.63138	100.88	1.62207	102.329	3.46667	98%		700.41	-16.4473	0.676408	3.7951	1071.37	1.93224	49.2355	0.543438	3.28046	3.70543	0.774554	18.9433	6.89919	84.9136	34.8649	165.4	36.9234	363.204	78.3164	13428.2	539.781	806.121
ZK0702-24-20	14.3883	451.347	799.099	0.564821	0.0484546	0.00255876	0.10041	0.00529102	0.0150521	0.000226634	0.285736	0.00493055	0.000150634		120.46	122.2	97.1543	4.88223	96.3088	1.43931	99.4126	3.02971	99%		676.468	-17.3175	0.45257	2.85023	850.098	0.00974792	41.4358	0.0332971	1.15628	2.03893	0.529133	14.416	5.17646	66.9705	27.1589	136.086	31.4337	314.803	68.7487	14067.4	451.347	799.099
ZK0702-24-21	7.07388	216.716	373.523	0.580195	0.0480703	0.00406427	0.100953	0.00745098	0.0157372	0.000331935	0.285778	0.00536642	0.000227586		101.94	198.12	97.6552	6.87197	100.659	2.10664	108.177	4.57547	96%		774.708	-15.2791	0.0303612	8.49011	728.883	0.00240023	23.5383	0.0519486	0.770334	2.18952	0.597282	12.327	4.5962	59.6058	22.7697	113.819	25.464	249.926	54.6788	12339.3	216.716	373.523
ZK0702-24-22	25.9041	813.317	1468.22	0.553948	0.0448937	0.00191128	0.0901517	0.00381667	0.0146038	0.000206706	0.334331	0.00468689	0.000142531		error		87.6446	3.55491	93.4612	1.31333	94.5112	2.86742	93%		692.405	-16.7325	0.603646	3.4541	1421.02	0.00868656	62.4102	0.0746431	1.57604	4.1561	0.72926	23.8358	8.6644	110.386	44.5511	220.335	50.5831	496.221	108.601	14052.9	813.317	1468.22
ZK0702-24-23	20.6569	608.452	1165.56	0.522026	0.0512191	0.0022089	0.104825	0.00475424	0.0147626	0.00023269	0.347533	0.00489944	0.000164585		250.065	98.1325	101.22	4.36939	94.4704	1.47819	98.7868	3.3104	93%		680.387	-16.8472	0.814784	2.98993	1108.1	5.97767	61.763	1.45717	7.30554	4.75587	0.61702	18.7042	6.56254	84.3037	35.0082	172.909	39.1887	397.381	87.8067	14376.8	608.452	1165.56
ZK0702-24-24	4.3854	214.109	225.08	0.951255	0.0556378	0.00597294	0.105879	0.00992847	0.0143885	0.000320491	0.237536	0.00444191	0.000189287		438.935	236.077	102.188	9.11626	92.093	2.03672	89.5821	3.809	89%		815.638	-14.4582	-0.0410889	12.623	1051.56	0.00769575	19.1863	0.112757	2.92523	6.29768	1.53012	29.1037	8.45937	95.1351	34.6608	153.025	30.9884	283.008	58.2863	11085.7	214.109	225.08
ZK0702-24-25	5.11139	163.277	264.893	0.616388	0.0496684	0.00433022	0.104312	0.00875756	0.0153834	0.000297419	0.230285	0.00477823	0.000201545		188.97	183.305	100.749	8.0525	98.413	1.88824	96.3486	4.0543	97%		772.452	-15.3719	-0.0111337	8.29902	625.258	0.00505532	19.2312	0.0344344	0.981413	1.99081	0.402142	11.9422	4.0162	49.9147	20.167	96.189	21.1431	204.494	46.0424	11982.2	163.277	264.893
ZK0702-24-26	15.6949	605.256	844.388	0.716799	0.0416824	0.00242729	0.0849082	0.00496756	0.0147856	0.000238794	0.276052	0.00439307	0.000171739		error	error	82.749	4.64925	94.6161	1.51693	88.5993	3.45604	86%		696.097	-16.6288	0.608863	3.60806	1315.83	0.142317	48.0809	0.128893	2.21834	4.34134	1.05093	25.1232	8.49039	103.614	41.1701	198.669	43.8962	427.931	92.5698	13016.5	605.256	844.388
ZK0702-24-27	4.76124	159.362	263.399	0.605023	0.0492635	0.00411122	0.0968141	0.00800166	0.0145326	0.000444469	0.370046	0.00470582	0.000237919		166.75	179.6	93.8312	7.40772	93.0091	2.82419	94.8921	4.78634	99%		766.713	-15.4661	0.0259574	7.82854	667.181	0.0148997	19.1247	0.0413094	0.982275	2.24895	0.604192	13.4273	4.42546	54.1875	21.6708	103.356	22.434	224.461	49.0596	11634.6	159.362	263.399
ZK0702-24-28	16.5361	496.543	899.765	0.551859	0.0475013	0.00238061	0.0981646	0.00508306	0.0149964	0.000246211	0.317067	0.00491761	0.000172807		76.02	114.8	95.0807	4.69992	95.9554	1.56373	99.1522	3.47573	99%		691.311	-16.3743	0.991117	3.40953	1274.71	5.24016	58.2139	1.46498	8.1519	4.62939	0.724947	21.1814	7.51576	95.4763	39.9789	201.663	46.314	462.739	103.165	12875.1	496.543	899.765
ZK0702-24-29	3.98472	133.196	202.309	0.658377	0.0489113	0.00432188	0.104512	0.00892182	0.0157658	0.000316976	0.235518	0.00483341	0.000262942		142.68	196.265	100.933	8.20205	100.84	2.01165	97.4587	5.28908	99%		804.714	-14.8253	-0.176708	11.3886	618.708	0.0124619	15.6222	0.0546325	1.0199	2.44457	0.524256	13.0506	4.34081	52.6109	20.3042	93.2582	20.0818	194.775	42.0681	11410	133.196	202.309
ZK0702-24-30	12.5971	347.419	689.034	0.504213	0.0441645	0.00264133	0.0921308	0.00558224	0.0153734	0.000297992	0.319913	0.00521475	0.000207746		error		89.4864	5.19	98.3493	1.8919	105.128	4.17723	90%		739.526	-15.821	0.313794	5.88464	987.584	0.0223571	36.6386	0.0650152	1.03214	2.30378	0.590689	15.2966	5.75526	75.7798	31.0571	154.031	35.7094	358.382	79.5775	13302.6	347.419	689.034
ZK0702-24-31	25.6821	949.021	1345.24	0.705467	0.0479324	0.00216914	0.100892	0.00491087	0.0152584	0.000212268	0.285807	0.00484356	0.000138874		94.535	103.695	97.5991	4.52946	97.6192	1.34781	97.6628	2.79343	99%		687.097	-17.0621	0.416921	3.24225	1807.08	0.285172	55.4388	0.245173	3.37528	6.70924	1.38139	36.7931	11.9671	144.409	56.865	270.452	60.6335	609.899	137.378	13909.7	949.021	1345.24
ZK0702-24-32	27.7238	1042.34	1352.13	0.770888	0.0463963	0.00177956	0.102987	0.00436038	0.0161	0.000241906	0.354878	0.00534518	0.000154296		16.765	92.585	99.5302	4.01408	102.961	1.53472	107.75	3.10208	96%		709.26	-15.6896	1.20329	4.20391	1929.07	10.5333	88.3486	2.87826	15.3785	9.36105	1.91096	40.21	13.4659	159.116	61.2667	289.997	64.3423	624.136	133.829	13046.1	1042.34	1352.13
ZK0702-24-33	14.2501	403.136	753.379	0.535104	0.0437201	0.00254772	0.096104	0.00577498	0.0160012	0.00025771	0.268021	0.00514158	0.000178395		error		93.1737	5.34974	102.334	1.63514	103.657	3.58731	90%		732.647	-16.2923	0.0107859	5.46127	1102.17	0.0212841	32.5141	0.043171	1.19018	3.36381	0.644401	18.4066	6.5803	84.4871	34.7149	170.776	38.7626	388.149	84.71	13481.4	403.136	753.379
ZK0702-24-34	4.39514	139.083	233.979	0.594425	0.0445474	0.00460506	0.0955281	0.0101119	0.0156153	0.000335842	0.203181	0.00517021	0.000264272		error		92.64	9.37237	99.8851	2.13169	104.232	5.31406	92%		775.448	-15.4783	-0.18558	8.55351	757.822	0.00506752	16.2223	0.0594324	1.04576	2.38378	0.561676	14.3425	4.85081	61.5587	23.6667	113.363	25.0401	242.766	52.3703	11863.2	139.083	233.979
ZK0702-24-35	19.1684	503.135	1084.98	0.463727	0.0491317	0.00232595	0.0999666	0.00488922	0.0147828	0.000221421	0.30625	0.00580557	0.000296656		153.79	111.095	96.7455	4.51328	94.5988	1.40658	117.004	5.96146	97%		707.905	-15.8686	1.05931	4.13904	798.561	16.5224	68.1875	3.47122	14.1834	3.75922	0.682666	13.3306	4.44172	56.4447	23.8618	124.621	29.1076	312.504	71.2005	13828.4	503.135	1084.98
